# Supplementary material for: Forecasting the effectiveness of the DeWorm3 trial in interrupting the transmission of soil-transmitted helminths in three study sites in Benin, India and Malawi
Source: PubMed Central journal article supplement (PMC7818558; doi:10.1186/s13071-020-04572-7), 2021-01-20
Supplement: 13071_2020_4572_MOESM1_ESM.pdf [file 13071_2020_4572_MOESM1_ESM.pdf]

## Additional File 1: Temporal sequence of events

The simulation represents the key features of the trial in each site (rounds of MDA, cross-sectional surveys, sampling, etc) as discrete instantaneous events. Tables 1-6 lists the key events in the life of the trial and their timings within the simulation. For those events that lay in the future at the time of writing, the approximate scheduled dates were used. Within the simulation, when standard of care and MDA occurred in very close succession in a country’s intervention arm, we have conflated them into a single MDA event. It is assumed the when MDA within the national program are scheduled in the same month as cross-sectional surveys, the surveys precede the treatment so as not to directly impact and bias the survey (See for example Table 1). National standard of care intervention is suspended in all arms between the last round of MDA and the endline. It is assumed, for the purposes of long-term disease dynamics, that the national standard of care interventions resume after this point and continue indefinitely.

| Time          | Event                       | Simulation time point |
|---------------|-----------------------------|-----------------------|
| Dec-Feb, 2018 | Baseline survey             | 2018.10               |
| Feb, 2018     | SoC intervention            | 2018.15               |
| Mar, 2018     | MDA: Round 1                | 2018.2                |
| Aug, 2018     | MDA: Round 2                | 2018.7                |
| Feb, 2019     | MDA: Round 3                | 2019.2                |
| Aug, 2019     | MDA: Round 4                | 2019.7                |
| Feb, 2020     | MDA: Round 5                | 2020.2                |
| Aug, 2020     | MDA: Round 6                | 2020.7                |
| Feb, 2021     | Post-intervention XS survey | 2021.15               |
| Aug, 2022     | Endline XS survey           | 2022.65               |
| Aug, 2022     | SoC intervention            | 2022.7                |

Table 1: India site, intervention arm: Past and future events and their time points within the simulation. SoC - Standard of Care; XS - cross-sectional; horizontal lines demarcate years.

| Time          | Event                       | Simulation time point |
|---------------|-----------------------------|-----------------------|
| Dec-Feb, 2018 | Baseline survey             | 2018.10               |
| Feb, 2018     | SoC intervention            | 2018.2                |
| Aug, 2018     | SoC intervention            | 2018.7                |
| Feb, 2019     | SoC intervention            | 2019.2                |
| Aug, 2019     | SoC intervention            | 2019.7                |
| Feb, 2020     | SoC intervention            | 2020.2                |
| Aug, 2020     | SoC intervention            | 2020.7                |
| Feb, 2021     | Post-intervention XS survey | 2021.15               |
| Aug, 2022     | Endline XS survey           | 2022.65               |

Table 2: India site, control arm: Past and future events and their time points within the simulation. SoC - Standard of Care; XS - cross-sectional; horizontal lines demarcate years.

| Time          | Event                       | Simulation time point |
|---------------|-----------------------------|-----------------------|
| Mar-Jun, 2018 | Baseline survey             | 2018.37               |
| Jul-Aug, 2018 | MDA: Round 1                | 2018.6                |
| Nov-Dec, 2018 | MDA: Round 2                | 2018.9                |
| Jun, 2019     | MDA: Round 3                | 2019.45               |
| Nov, 2019     | MDA: Round 4                | 2019.9                |
| Jul-Aug, 2020 | MDA: Round 5                | 2020.45               |
| Nov-Dec, 2020 | MDA: Round 6                | 2020.9                |
| Jun, 2021     | Post-intervention XS survey | 2021.45               |
| Nov-Dec, 2022 | Endline XS survey           | 2022.9                |

Table 3: Malawi site, intervention arm: Past and future events and their time points within the simulation. SoC - Standard of Care; XS - cross-sectional; horizontal lines demarcate years.

| Time          | Event                    | Simulation time point |
|---------------|--------------------------|-----------------------|
| Mar-Jun, 2018 | Baseline survey          | 2018.37               |
| Nov, 2018     | SoC intervention         | 2018.85               |
| Nov, 2019     | SoC intervention         | 2019.85               |
| Nov, 2020     | SoC intervention         | 2020.85               |
| Jun, 2021     | Post-Intervention Survey | 2021.45               |
| Nov-Dec, 2022 | Endline Survey           | 2022.9                |

Table 4: Malawi site, control arm: Past and future events and their time points within the simulation. SoC - Standard of Care; XS - cross-sectional; horizontal lines demarcate years.

| Time          | Event                    | Simulation time point |
|---------------|--------------------------|-----------------------|
| Apr-May, 2018 | Baseline survey          | 2018.35               |
| Jun, 2018     | MDA: round 1             | 2018.45               |
| Nov, 2018     | MDA: round 2             | 2018.9                |
| Jun, 2019     | MDA: round 3             | 2019.45               |
| Nov, 2019     | MDA: round 4             | 2019.9                |
| Jun, 2020     | MDA: round 5             | 2020.45               |
| Nov, 2020     | MDA: round 6             | 2020.9                |
| Apr, 2021     | Post-Intervention Survey | 2021.3                |
| Oct, 2022     | Endline Survey           | 2022.8                |

Table 5: Benin site, Intervention arm: Past and future events and their time points within the simulation. SoC - Standard of Care; XS - cross-sectional; horizontal lines demarcate years.

| Time          | Event                    | Simulation time point |
|---------------|--------------------------|-----------------------|
| Apr-May, 2018 | Baseline survey          | 2018.35               |
| Nov, 2018     | SoC Intervention         | 2018.9                |
| Nov, 2019     | SoC Intervention         | 2019.9                |
| Nov, 2020     | SoC Intervention         | 2020.9                |
| Apr, 2021     | Post-Intervention Survey | 2021.3                |
| Oct, 2022     | Endline Survey           | 2022.8                |

Table 6: Benin site, Control arm: Past and future events and their time points within the simulation. SoC - Standard of Care; horizontal lines demarcate years.
